# Supplementary material for: A MIP-enabled stainless-steel hypodermic needle sensor for electrochemical detection of aflatoxin B1
Source: Royal Society of Chemistry journal article supplement (doi:10.1039/d1ay02084f), 2022-01-01

## Supplementary Material

### A MIP-enabled stainless-steel microneedle sensor for electrochemical detection of aflatoxin B1

Marika Wood<sup>a</sup>, and Samuel M. Mugo<sup>a\*</sup>

<sup>a</sup> Physical Sciences Department, MacEwan University, 10700-104 Avenue, Edmonton, AB, T5J 4S2 Canada. E-mail: mugos@macewan.ca; Tel: (+1) 780-633-3493; Fax: (+1) 780-497-5655

**Fig. S1** Image of the electrochemical setup using the microneedle electrode.

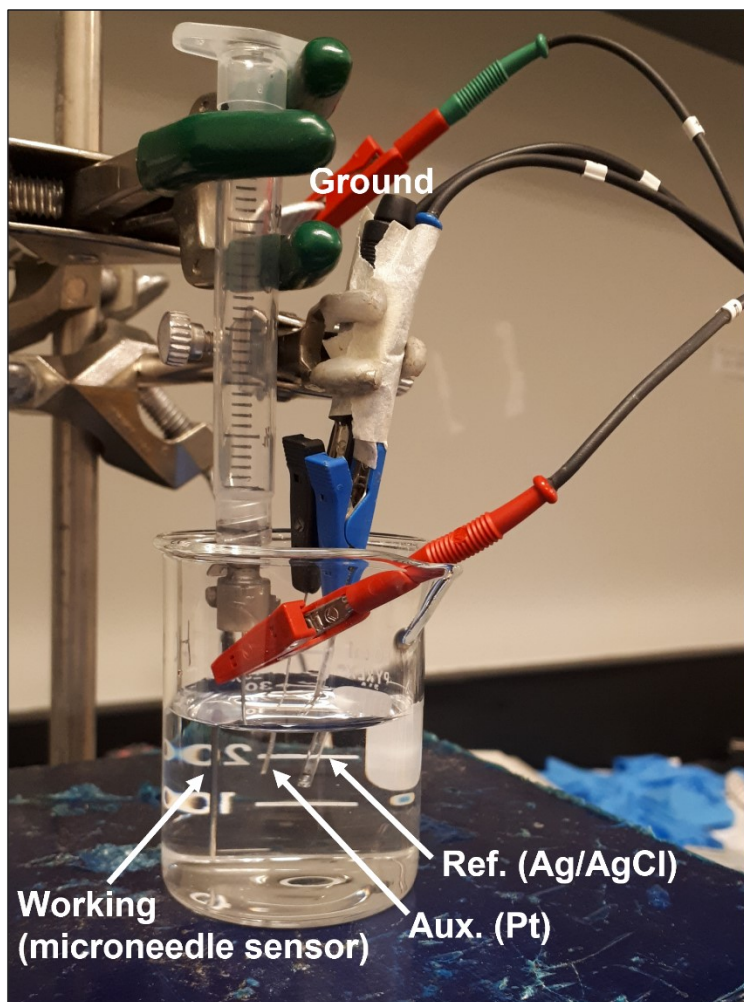

**Fig. S2** Overlapped voltammograms of electrochemical removal of DMC from PANI@MIP/CNC-CNT/microneedle sensor.

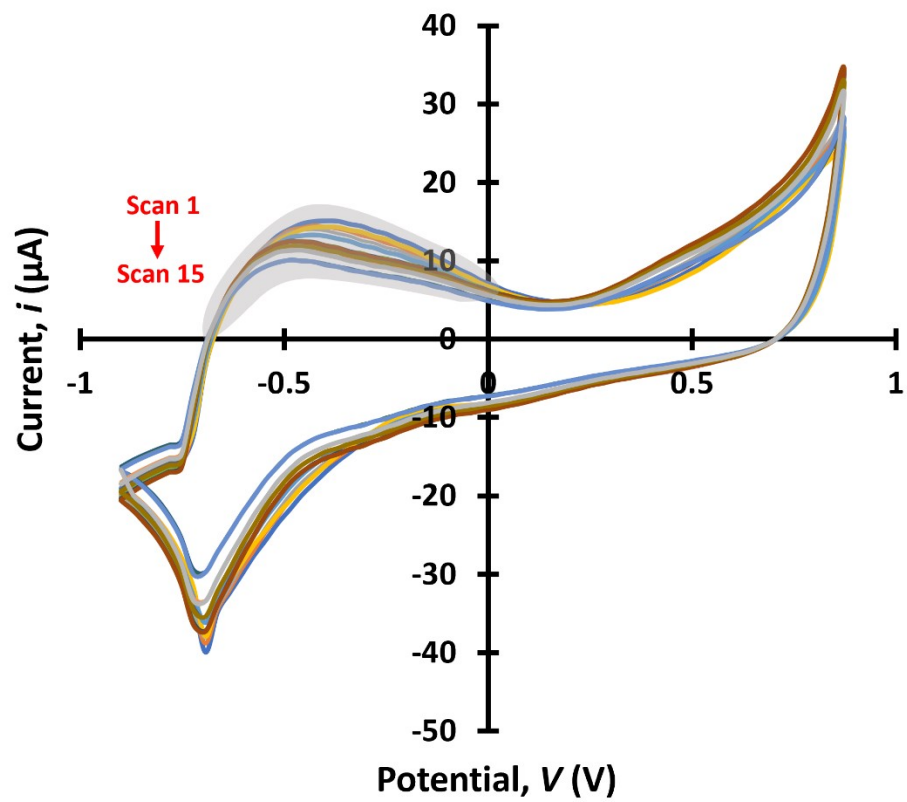

**Fig. S3** (A) SEM image of PANI@MIP/CNC-CNT printed on a flat polyvinyl acetate transparency; (B) Image highlighting the pores on the PANI@MIP/CNC-CNT SEM image generated using the particle finder function of ImageJ software; (C) SEM image of PANI@NIP/CNC-CNT printed on a flat transparency; (D) Image highlighting the pores on the PANI@NIP/CNC-CNT SEM image generated using the particle finder function of ImageJ software.

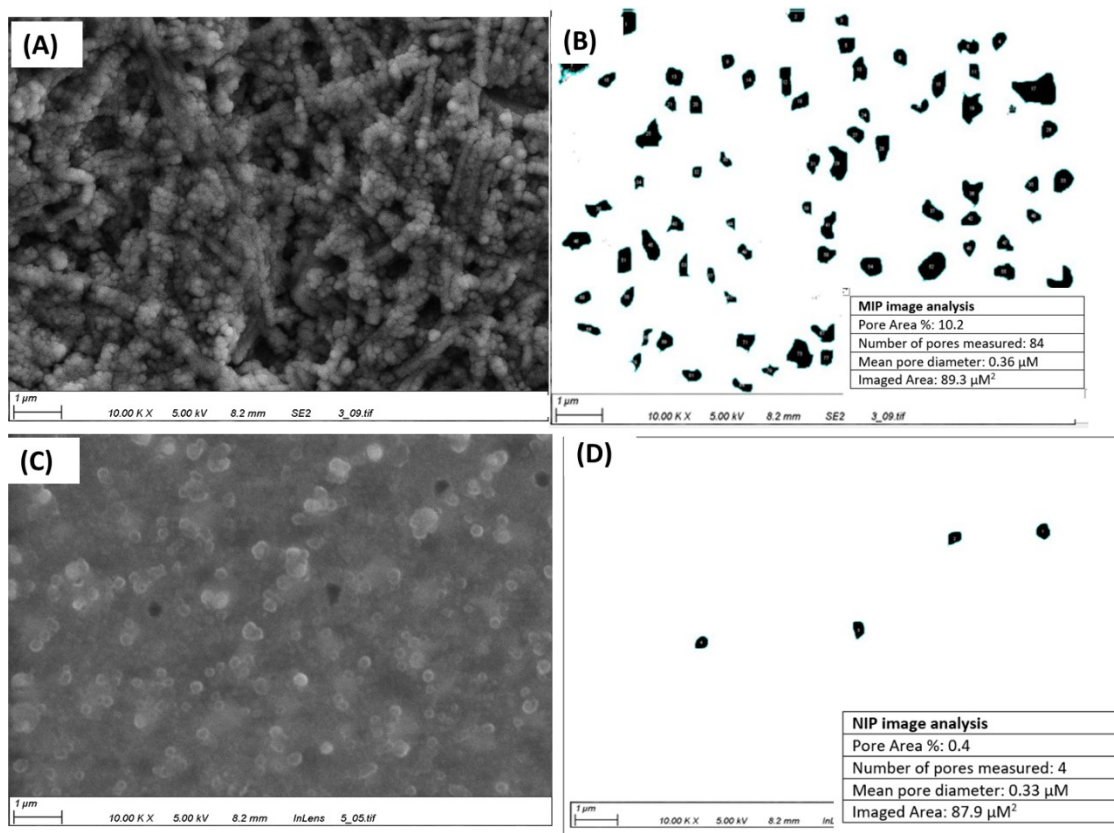

**Fig. S4** Overlapped voltammograms of the electrochemical cleaning of AFB1 from the PANI@MIP/CNC-CNT/microneedle sensor for (A) cycle 1 and (B) cycle 7 of the sensor reusability experiment.

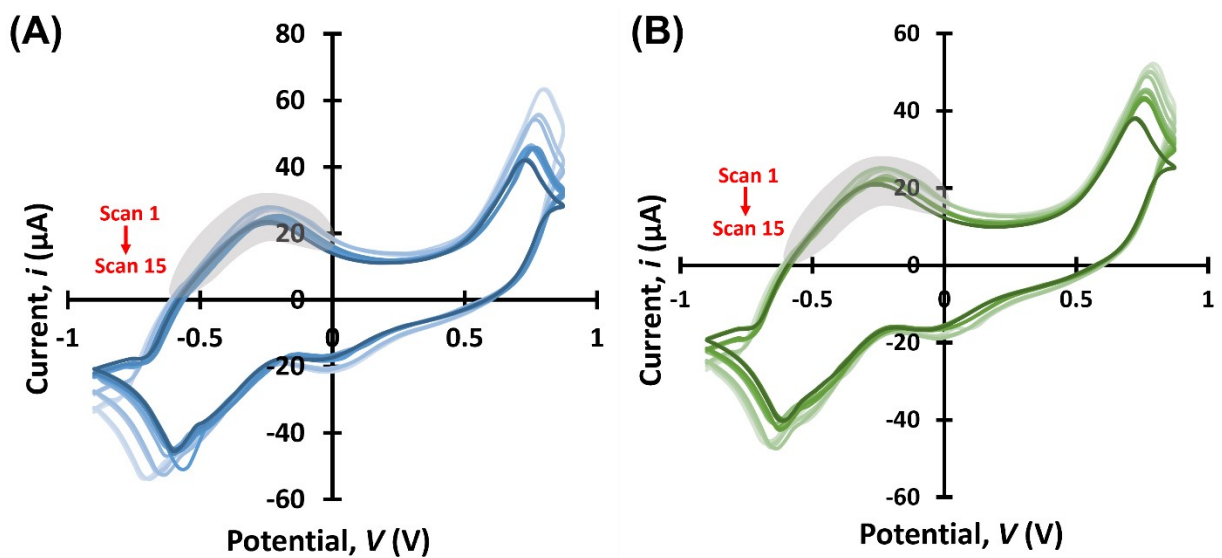

Supplement: d1ay02084f1.pdf [file d1ay02084f1.pdf]
